# Supplementary material for: Unprecedented rock-salt ordering of A and B cations in the double perovskite Nd2−xCaxMgTiO6−δ and defect association
Source: Royal Society of Chemistry journal article supplement (doi:10.1039/c9dt02768h), 2019-01-01
Supplement: c9dt02768h1.pdf [file c9dt02768h1.pdf]

# Unprecedented rock-salt ordering of A and B cations in the double perovskite $\text{Nd}_{2-x}\text{Ca}_x\text{MgTiO}_{6-\delta}$ and defect association

M. Teresa Azcondo,<sup>a,\*</sup> Khalid Boulahya,<sup>b</sup> Clemens Ritter,<sup>c</sup> Flaviano García-Alvarado<sup>a</sup> and Ulises Amador<sup>a</sup>

<sup>a</sup> Universidad San Pablo-CEU, CEU Universities, Facultad de Farmacia, Departamento de Química y Bioquímica, Urbanización Montepríncipe, Boadilla del Monte, E-28668, Madrid, Spain.

<sup>b</sup> Departamento de Química Inorgánica, Facultad de Química, Universidad Complutense, E-28040 Madrid, Spain.

<sup>c</sup> Institut Laue-Langevin, BP 156-38042 Grenoble Cedex 9, France.

\* e-mail: [azcondo@ceu.es](mailto:azcondo@ceu.es)

Phone: (34) 91 372 47 15

Fax: (34) 91 351 04 96.

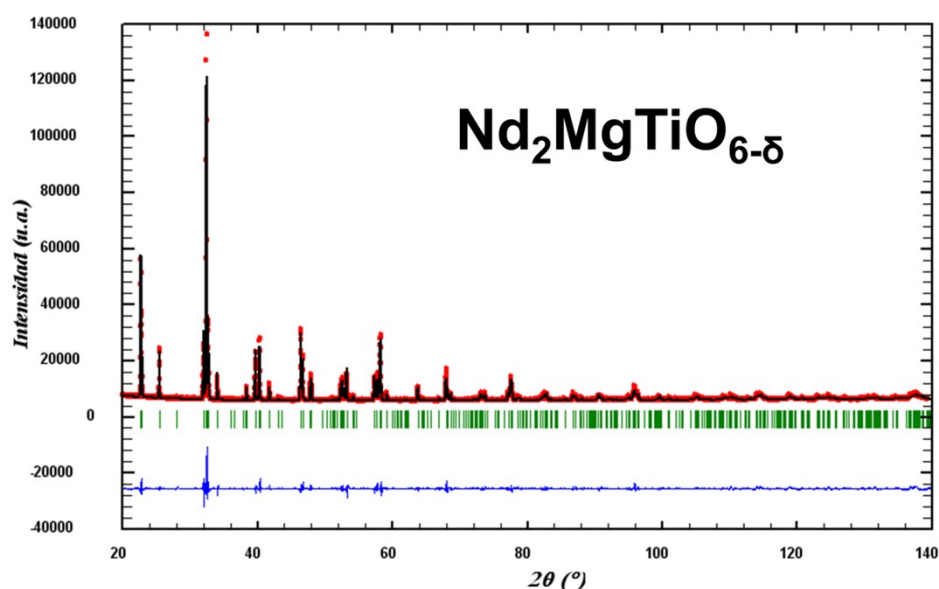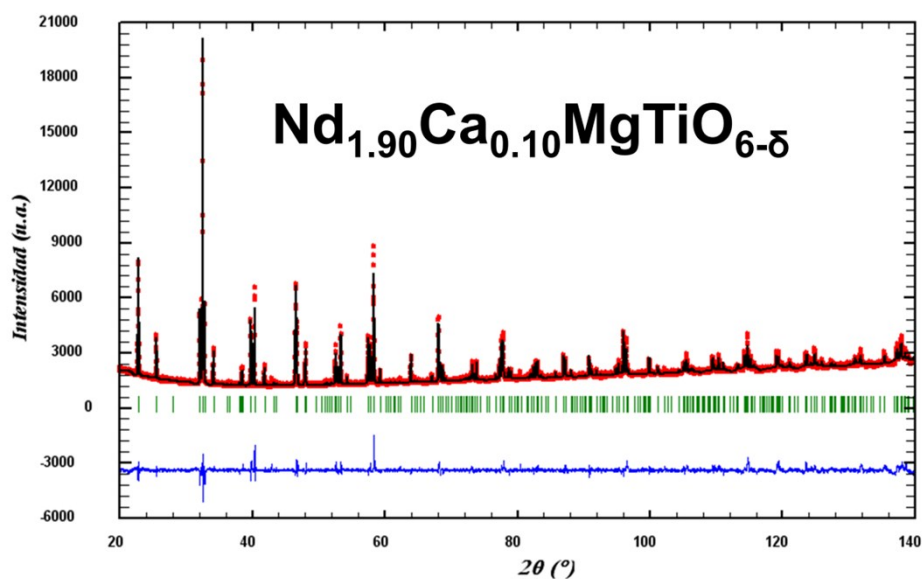

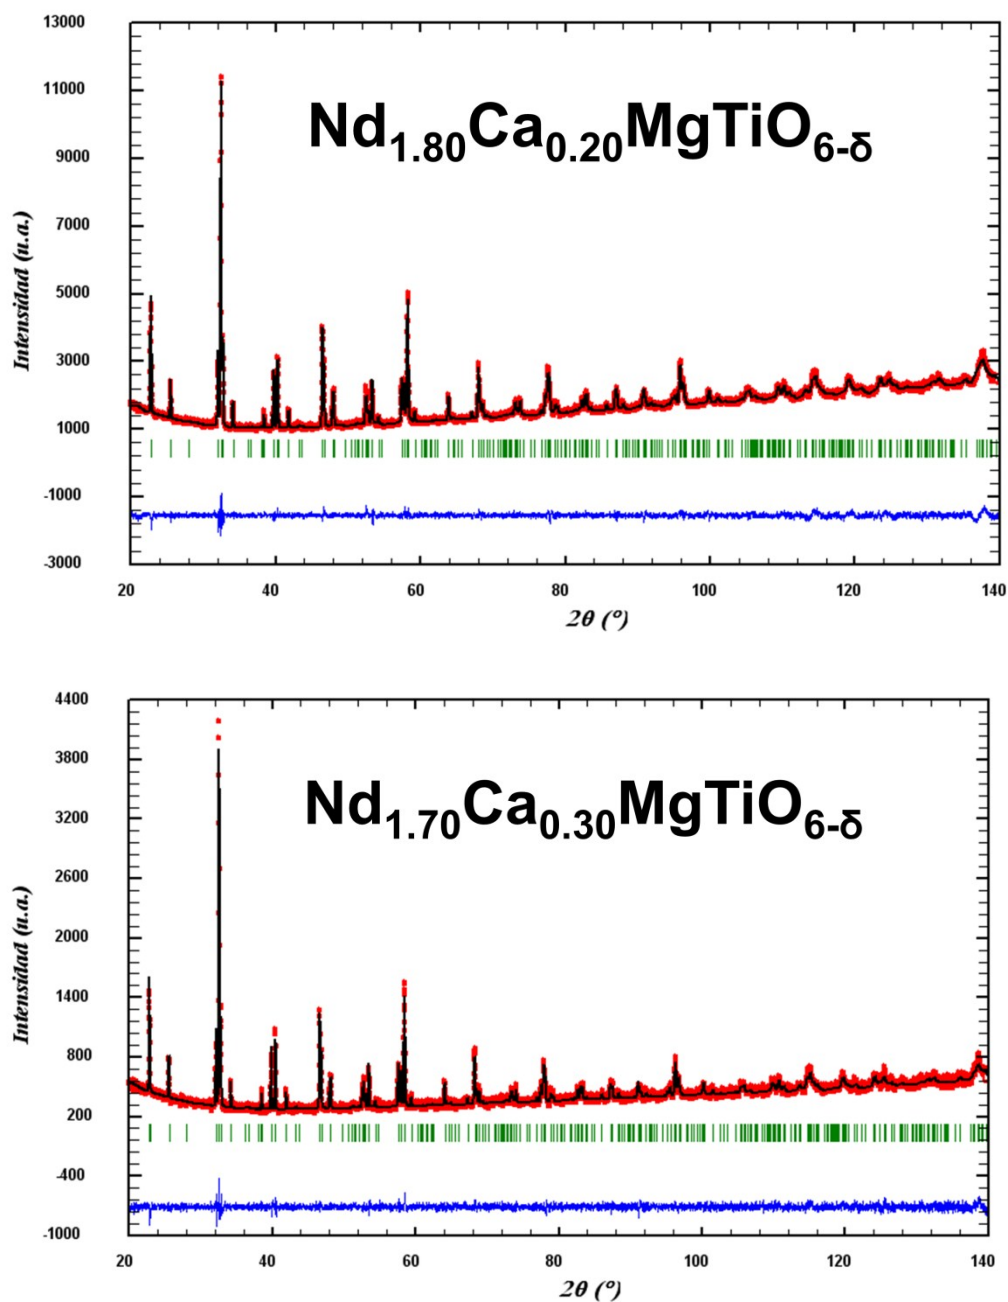

**Figure SI 1.** Experimental (red circles) and calculated (black continuous line) XRD patterns (and their difference, blue line at the bottom) for samples of the series  $\text{Nd}_{2-x}\text{Ca}_x\text{MgTiO}_{6-\delta}$  with ( $x=0, 0.10, 0.20$  and  $0.30$ ) prepared in air. Vertical bars indicate the positions of the Bragg peaks of the identified phases contained in the sample.

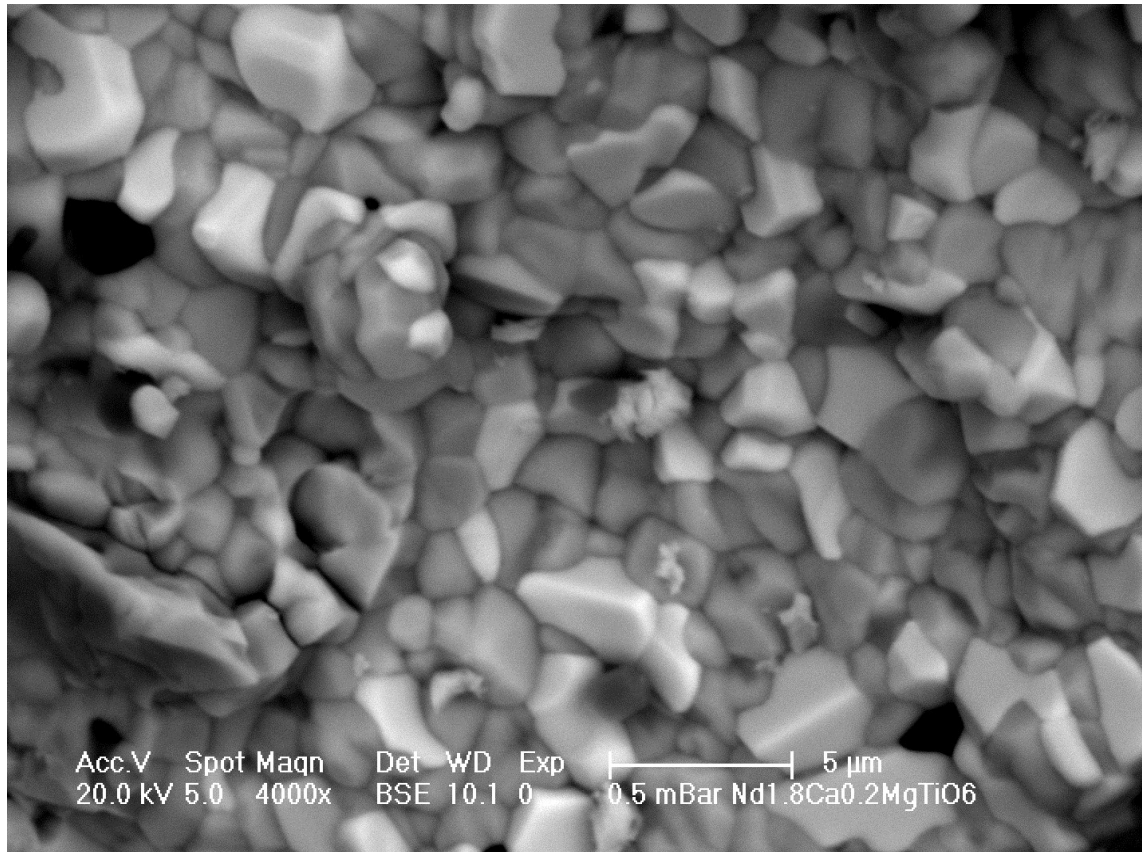

**Figure SI 2:** Back-scattered electrons (BSE) image taken at a magnification of x 4000 on a sample of composition  $\text{Nd}_{1.80}\text{Ca}_{0.20}\text{MgTiO}_{6-\delta}$ . Segregation of two different phases is evident as revealed by their different contrasts.

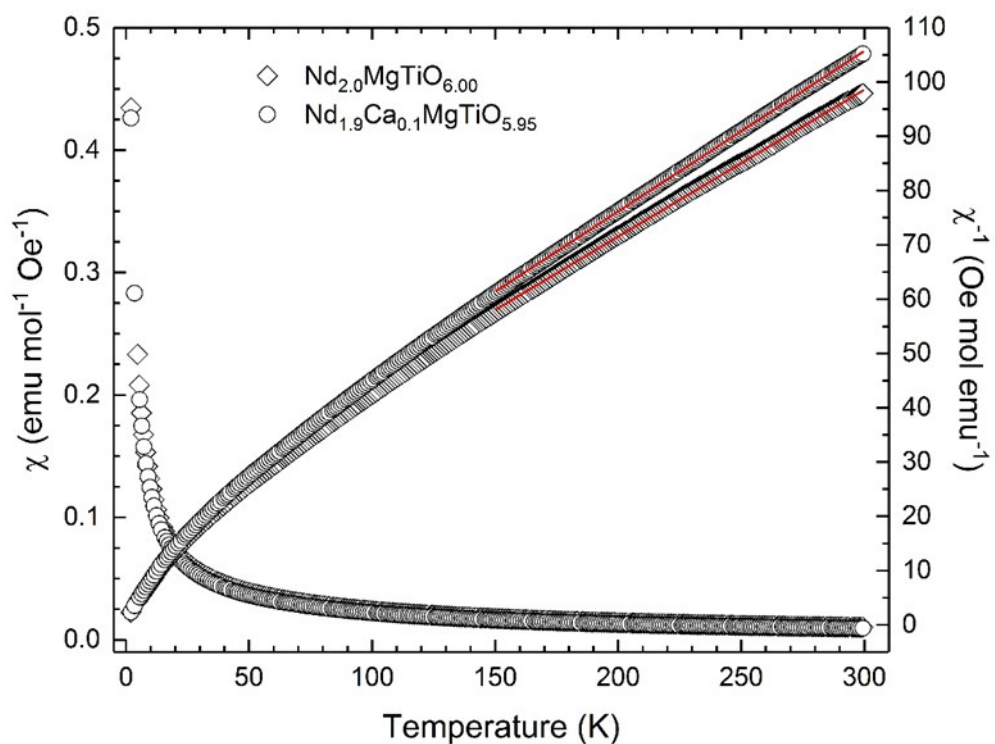

**Figure SI 3.** Temperature dependence, in an applied magnetic field of 100 mT, of the molar magnetic susceptibility and its inverse for  $\text{Nd}_2\text{MgTiO}_6$  (circles) and  $\text{Nd}_{1.9}\text{Ca}_{0.1}\text{MgTiO}_{5.95}$  (diamonds) compounds. The solid red lines correspond to the fits of  $\chi^{-1}$  data from RT to 150 K to the inverse of the Curie-Weiss law.

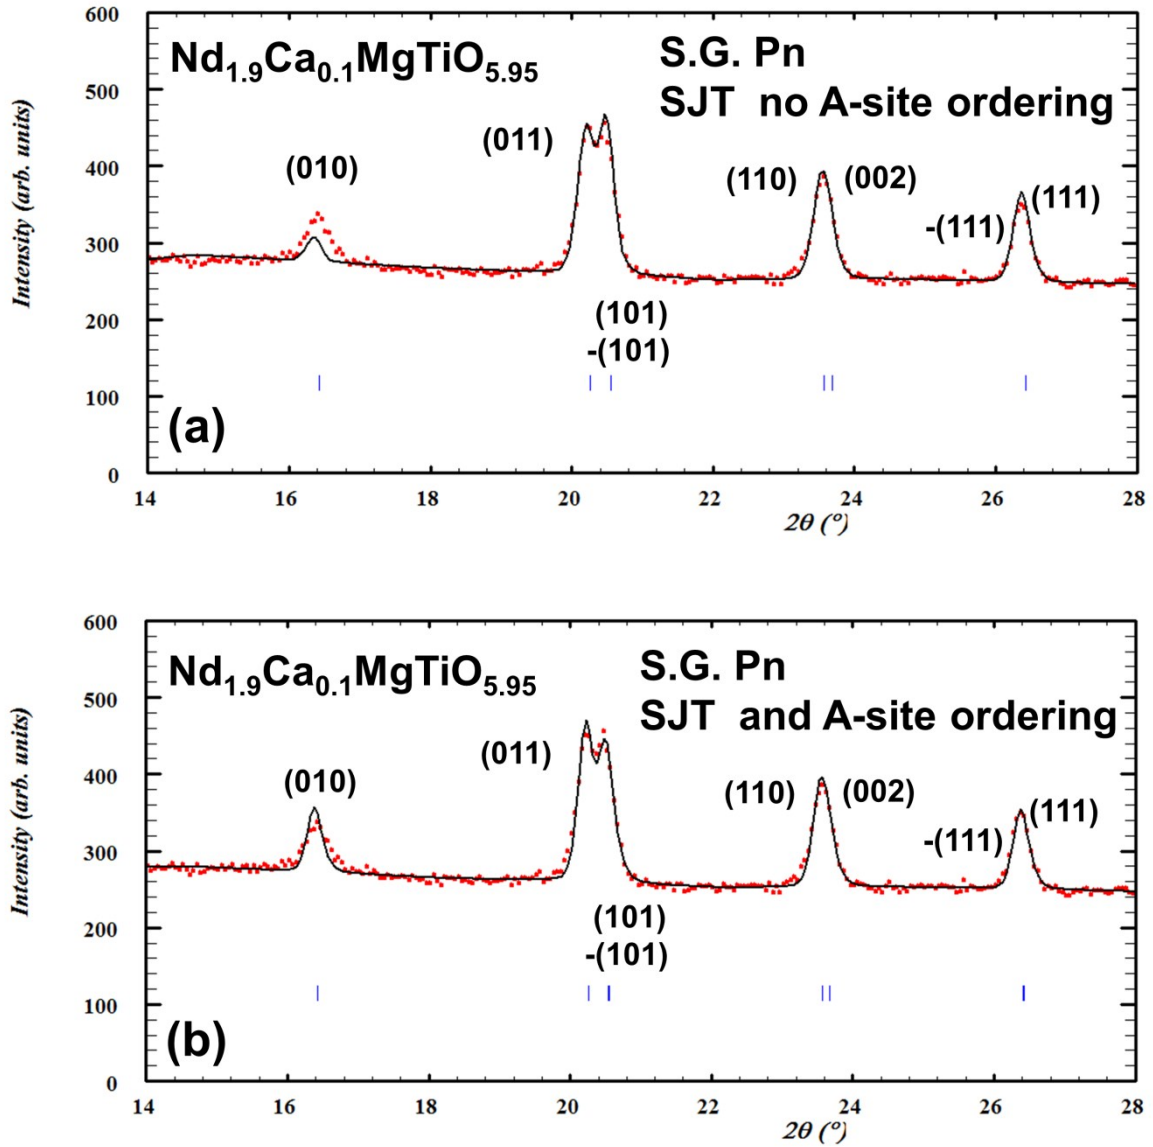

**Figure SI 4.** Enlargement of the low-angle zone of the NPD data of  $\text{Nd}_{1.9}\text{Ca}_{0.1}\text{MgTiO}_{5.95}$  fitted to a structural model with Pn S.G. due to the loss of symmetry (from  $P2_1/n$  to Pn) associated to (a) only the second-order Jahn-Teller effect (SJT) due to tetravalent titanium and (b) the combined effect of SJT and rock-salt ordering of A-ions. Note that the intensity of the (010) Bragg peak, forbidden in the S.G.  $P2_1/n$  of the parent (un-doped) material, is much better accounted for with the latter model.

**Table SI 1.** Nominal and experimental (determined by EDS) compositions for the  $\text{Nd}_2\text{MgTiO}_{6.6}$  sample used for NPD and electrical characterization.

| <b>Element</b> | <b>Nominal composition<br/>(atom %)</b> | <b>Experimental composition<br/>(atom %)</b> |
|----------------|-----------------------------------------|----------------------------------------------|
| <b>Nd</b>      | 20.0                                    | 20.6(3)                                      |
| <b>Mg</b>      | 10.0                                    | 10.3(2)                                      |
| <b>Ti</b>      | 10.0                                    | 9.5(3)                                       |
| <b>O</b>       | 60.0                                    | 59.6(3)                                      |

**Table SI 2.** Nominal and experimental (determined by EDS) compositions for the  $\text{Nd}_{1.90}\text{Ca}_{0.10}\text{MgTiO}_{6.6}$  sample used for NPD and electrical characterization.

| <b>Element</b> | <b>Nominal composition<br/>(atom %)</b> | <b>Experimental composition<br/>(atom %)</b> |
|----------------|-----------------------------------------|----------------------------------------------|
| <b>Nd</b>      | 19.0                                    | 19.2(4)                                      |
| <b>Ca</b>      | 1.0                                     | 1.0(1)                                       |
| <b>Mg</b>      | 10.0                                    | 10.8(1)                                      |
| <b>Ti</b>      | 10.0                                    | 10.4(1)                                      |
| <b>O</b>       | 60.0                                    | 58.6(4)                                      |

**Table SI 3.** Structural parameters for  $\text{Nd}_{2-x}\text{Ca}_x\text{MgTiO}_{6-\delta}$  obtained from joint fitting of NPD and XRD data. Agreement factors are given for the fitting of NPD data.

| Sample                                                                                                                                                                                                                                   | $x = 0.00^a$ |                              |           |                                                                                                                                                                                                | $x = 0.10^b$      |                              |           |  |
|------------------------------------------------------------------------------------------------------------------------------------------------------------------------------------------------------------------------------------------|--------------|------------------------------|-----------|------------------------------------------------------------------------------------------------------------------------------------------------------------------------------------------------|-------------------|------------------------------|-----------|--|
| Space Group                                                                                                                                                                                                                              | $P2_1/n$     |                              |           |                                                                                                                                                                                                | $Pn$              |                              |           |  |
| <i>a</i> (Å)                                                                                                                                                                                                                             | 5.4599(1)    |                              |           |                                                                                                                                                                                                | 5.4621(1)         |                              |           |  |
| <i>b</i> (Å)                                                                                                                                                                                                                             | 5.5871(1)    |                              |           |                                                                                                                                                                                                | 5.5791(1)         |                              |           |  |
| <i>c</i> (Å)                                                                                                                                                                                                                             | 7.7681(1)    |                              |           |                                                                                                                                                                                                | 7.7689(2)         |                              |           |  |
| $\beta$ (deg)                                                                                                                                                                                                                            | 90.005(1)    |                              |           |                                                                                                                                                                                                | 90.003(4)         |                              |           |  |
| Volume (Å <sup>3</sup> )                                                                                                                                                                                                                 | 236.97(1)    |                              |           |                                                                                                                                                                                                | 236.75(1)         |                              |           |  |
| <b>A position</b>                                                                                                                                                                                                                        | 4e           | <b>O1 position</b>           | 4e        | <b>A' position</b>                                                                                                                                                                             | 2a                | <b>O1b position</b>          | 2a        |  |
| <b>Occ Nd</b>                                                                                                                                                                                                                            | 1            | <b>X</b>                     | 0.3015(5) | <b>Occ Nd/Ca</b>                                                                                                                                                                               | 0.90(1)/0.10(1)   | <b>X</b>                     | 0.786(4)  |  |
| <b>X</b>                                                                                                                                                                                                                                 | 0.0097(3)    | <b>Y</b>                     | 0.2872(4) | <b>X</b>                                                                                                                                                                                       | 0.084(4)          | <b>Y</b>                     | 0.972(1)  |  |
| <b>Y</b>                                                                                                                                                                                                                                 | 0.0473(2)    | <b>Z</b>                     | 0.9528(4) | <b>Y</b>                                                                                                                                                                                       | 0.290(6)          | <b>Z</b>                     | 0.141 (4) |  |
| <b>Z</b>                                                                                                                                                                                                                                 | 0.7509(3)    | <b>Occ</b>                   | 1.000(4)  | <b>Z</b>                                                                                                                                                                                       | 0.841(4)          | <b>Occ</b>                   | 1.002(3)  |  |
| <b>U*100 (Å<sup>2</sup>)</b>                                                                                                                                                                                                             | 0.03(1)      | <b>U*100 (Å<sup>2</sup>)</b> | 0.17(2)   | <b>U*100 (Å<sup>2</sup>)</b>                                                                                                                                                                   | 0.45(7)           | <b>U*100 (Å<sup>2</sup>)</b> | 0.29(4)   |  |
| <b>B' position</b>                                                                                                                                                                                                                       | 2c           | <b>O2 position</b>           | 4e        | <b>A'' position</b>                                                                                                                                                                            | 2a                | <b>O2a position</b>          | 2a        |  |
| <b>Occ Mg</b>                                                                                                                                                                                                                            | 1            | <b>X</b>                     | 0.2872(5) | <b>Occ Nd/Ca</b>                                                                                                                                                                               | 1.00(1)/0         | <b>X</b>                     | 0.366(4)  |  |
| <b>U*100 (Å<sup>2</sup>)</b>                                                                                                                                                                                                             | 0.55(4)      | <b>Y</b>                     | 0.3035(4) | <b>X</b>                                                                                                                                                                                       | 0.067(4)          | <b>Y</b>                     | 0.553(2)  |  |
| <b>B'' position</b>                                                                                                                                                                                                                      | 2d           | <b>Z</b>                     | 0.5446(4) | <b>Y</b>                                                                                                                                                                                       | 0.1958(6)         | <b>Z</b>                     | 0.636(4)  |  |
| <b>Occ Ti</b>                                                                                                                                                                                                                            | 1            | <b>Occ</b>                   | 0.998(3)  | <b>Z</b>                                                                                                                                                                                       | 0.340(4)          | <b>Occ</b>                   | 1.000(2)  |  |
| <b>U*100 (Å<sup>2</sup>)</b>                                                                                                                                                                                                             | 0.58(4)      | <b>U*100 (Å<sup>2</sup>)</b> | 0.17(2)   | <b>U*100 (Å<sup>2</sup>)</b>                                                                                                                                                                   | 0.06(4)           | <b>U*100 (Å<sup>2</sup>)</b> | 0.29(4)   |  |
|                                                                                                                                                                                                                                          |              | <b>O3 position</b>           | 4e        | <b>B' position</b>                                                                                                                                                                             | 2a                | <b>O2b position</b>          | 2a        |  |
|                                                                                                                                                                                                                                          |              | <b>X</b>                     | 0.9126(3) | <b>Occ Mg/Ti</b>                                                                                                                                                                               | 0.127(3)/0.873(3) | <b>X</b>                     | 0.787(4)  |  |
|                                                                                                                                                                                                                                          |              | <b>Y</b>                     | 0.4763(3) | <b>X</b>                                                                                                                                                                                       | 0.59047           | <b>Y</b>                     | 0.956(1)  |  |
|                                                                                                                                                                                                                                          |              | <b>Z</b>                     | 0.7429(4) | <b>Y</b>                                                                                                                                                                                       | 0.262(3)          | <b>Z</b>                     | 0.546(4)  |  |
|                                                                                                                                                                                                                                          |              | <b>Occ</b>                   | 1.002(4)  | <b>Z</b>                                                                                                                                                                                       | 0.09002           | <b>Occ</b>                   | 0.998(4)  |  |
|                                                                                                                                                                                                                                          |              | <b>U*100 (Å<sup>2</sup>)</b> | 0.17(2)   | <b>U*100 (Å<sup>2</sup>)</b>                                                                                                                                                                   | 0.01(3)           | <b>U*100 (Å<sup>2</sup>)</b> | 0.29(4)   |  |
|                                                                                                                                                                                                                                          |              |                              |           | <b>B'' position</b>                                                                                                                                                                            | 2a                | <b>O3a position</b>          | 2a        |  |
|                                                                                                                                                                                                                                          |              |                              |           | <b>Occ Mg/Ti</b>                                                                                                                                                                               | 0.873(3)/0.127(3) | <b>X</b>                     | -0.007(4) |  |
|                                                                                                                                                                                                                                          |              |                              |           | <b>X</b>                                                                                                                                                                                       | 0.0912(3)         | <b>Y</b>                     | 0.736(1)  |  |
|                                                                                                                                                                                                                                          |              |                              |           | <b>Y</b>                                                                                                                                                                                       | 0.764(2)          | <b>Z</b>                     | 0.833(4)  |  |
|                                                                                                                                                                                                                                          |              |                              |           | <b>Z</b>                                                                                                                                                                                       | 0.082(3)          | <b>Occ</b>                   | 0.999(3)  |  |
|                                                                                                                                                                                                                                          |              |                              |           | <b>U*100 (Å<sup>2</sup>)</b>                                                                                                                                                                   | 0.01(4)           | <b>U*100 (Å<sup>2</sup>)</b> | 0.29(4)   |  |
|                                                                                                                                                                                                                                          |              |                              |           | <b>O1a position</b>                                                                                                                                                                            | 2a                | <b>O3b position</b>          | 2a        |  |
|                                                                                                                                                                                                                                          |              |                              |           | <b>X</b>                                                                                                                                                                                       | 0.387(4)          | <b>X</b>                     | 0.164(4)  |  |
|                                                                                                                                                                                                                                          |              |                              |           | <b>Y</b>                                                                                                                                                                                       | 0.555(2)          | <b>Y</b>                     | 0.782(1)  |  |
|                                                                                                                                                                                                                                          |              |                              |           | <b>Z</b>                                                                                                                                                                                       | 0.045(4)          | <b>Z</b>                     | 0.344(4)  |  |
|                                                                                                                                                                                                                                          |              |                              |           | <b>Occ</b>                                                                                                                                                                                     | 0.945(5)          | <b>Occ</b>                   | 1.003(3)  |  |
|                                                                                                                                                                                                                                          |              |                              |           | <b>U*100 (Å<sup>2</sup>)</b>                                                                                                                                                                   | 0.29(4)           | <b>U*100 (Å<sup>2</sup>)</b> | 0.29(4)   |  |
| <sup>a</sup> $P2_1/n$ (#14): 4e (xyz), 2c ( $\frac{1}{2}$ 0 $\frac{1}{2}$ ), 2d ( $\frac{1}{2}$ 0 0),<br>$\chi^2 = 1.94$ , $R_{wp} = 4.31\%$ , $R_{exp} = 3.10\%$ , $R_B = 2.69\%$ ,<br>Composition: $\text{Nd}_2\text{MgTiO}_{6.00(1)}$ |              |                              |           | <sup>b</sup> $Pn$ (#7): 2a (xyz)<br>$\chi^2 = 11.0$ , $R_{wp} = 3.69\%$ , $R_{exp} = 1.11\%$ , $R_B = 2.81\%$ ,<br>Composition: $\text{Nd}_{1.90(1)}\text{Ca}_{0.10(1)}\text{MgTiO}_{5.94(1)}$ |                   |                              |           |  |

**Table SI 4.** Selected structural information for  $\text{Nd}_{2-x}\text{Ca}_x\text{MgTiO}_{6-\delta}$  ( $x=0.00, 0.10$ ) obtained from NPD data. Angles are given in degrees and distances in Å (up to 3.50 Å); distortion  $\Delta$  of the  $\text{BO}_n$  polyhedra and Bond Valence Sums [1], are reported as  $\Delta=1/n \sum_{j=1,n} \{(d_n - \langle d \rangle)/\langle d \rangle\}^2$  where  $\langle d \rangle$  is the average B-O distance. The quadratic elongation  $\lambda$  is given by  $\lambda= \sum_{j=1,n} (l_j/l_0)^2/n$  and the bond-angle variance  $\sigma$  is given by  $\sigma = \sum_{j=1,n} (\theta_j - \theta_0)^2/(n-1)$  where  $l_0$  and  $\theta_0$  are the cation-anion bond lengths and cation-anion-cation bond angles in regular coordination polyhedra, respectively, and  $l_j$  and  $\theta_j$  are the cation-anion bond lengths and cation-anion-cation bond angles of the  $i$ th bond [2]

| <b>Nd<sub>2</sub>MgTiO<sub>6.00(1)</sub></b>         |                         | <b>Nd<sub>1.90(1)</sub>Ca<sub>0.10(1)</sub>MgTiO<sub>5.94(1)</sub></b> |                         |                                   |         |
|------------------------------------------------------|-------------------------|------------------------------------------------------------------------|-------------------------|-----------------------------------|---------|
| <sup>a</sup> Tilt angle $\theta$                     | 20.05(3)/19.77(4)       | <sup>a</sup> Tilt angle $\theta$                                       | 21.0(1)/17.6(2)         |                                   |         |
| <sup>b</sup> Tilt angle $\phi$                       | 20.05(3)/19.77(4)       | <sup>b</sup> Tilt angle $\phi$                                         | 21.0(1)/17.7(1)         |                                   |         |
| <sup>c</sup> Tilt angle $\mu$                        | 14.5(1)/14.2(1)         | <sup>c</sup> Tilt angle $\mu$                                          | 15.8(3)/12.5(3)         |                                   |         |
| <b>TiO<sub>6</sub> octahedron</b>                    |                         | <b>B'(Mg/Ti)O<sub>6</sub> octahedron</b>                               |                         |                                   |         |
| <b>B'-O(1) x 2</b>                                   | 1.970(2)                | <b>B'-O1a x 1</b>                                                      | 2.01(2)                 |                                   |         |
| <b>B'-O(2) x 2</b>                                   | 1.945(3)                | <b>B'-O1b x 1</b>                                                      | 1.98(1)                 |                                   |         |
| <b>B'-O(3) x 2</b>                                   | 1.951(3)                | <b>B'-O2a x 1</b>                                                      | 1.86(2)                 |                                   |         |
|                                                      |                         | <b>B'-O2b x 1</b>                                                      | 2.08(2)                 |                                   |         |
|                                                      |                         | <b>B'-O3a x 1</b>                                                      | 1.96(3)                 |                                   |         |
|                                                      |                         | <b>B'-O3b x 1</b>                                                      | 1.97(3)                 |                                   |         |
| <b>Average B'-O</b>                                  | 1.956(1)                | <b>Average B'-O</b>                                                    | 1.98(1)                 |                                   |         |
| <b>Octahedron volume (Å<sup>3</sup>)</b>             | 9.966                   | <b>Octahedron volume (Å<sup>3</sup>)</b>                               | 10.262                  |                                   |         |
| <b>Distortion B'-O<sub>6</sub> x 10<sup>4</sup></b>  | 0.30                    | <b>Distortion B'-O<sub>6</sub> x 10<sup>4</sup></b>                    | 11.2                    |                                   |         |
| <b>Quadratic elongation</b>                          | 1.0003                  | <b>Quadratic elongation</b>                                            | 1.0031                  |                                   |         |
| <b>Bond angle variance</b>                           | 0.6761 deg <sup>2</sup> | <b>Bond angle variance</b>                                             | 6.7651 deg <sup>2</sup> |                                   |         |
| <b>BVS</b>                                           | 4.11(1)                 | <b>BVS</b>                                                             | 3.91(8)                 |                                   |         |
| <b>MgO<sub>6</sub> octahedron</b>                    |                         | <b>B''(Mg/Ti)O<sub>6</sub> octahedron</b>                              |                         |                                   |         |
| <b>B''-O(1) x 2</b>                                  | 2.064(3)                | <b>B''-O1a x 1</b>                                                     | 2.01(2)                 |                                   |         |
| <b>B''-O(2) x 2</b>                                  | 2.085(3)                | <b>B''-O1b x 1</b>                                                     | 2.08(2)                 |                                   |         |
| <b>B''-O(3) x 2</b>                                  | 2.058(3)                | <b>B''-O2a x 1</b>                                                     | 2.19(2)                 |                                   |         |
|                                                      |                         | <b>B''-O2b x 1</b>                                                     | 1.92(2)                 |                                   |         |
|                                                      |                         | <b>B''-O3a x 1</b>                                                     | 2.01(4)                 |                                   |         |
|                                                      |                         | <b>B''-O3b x 1</b>                                                     | 2.08(4)                 |                                   |         |
| <b>Average B''-O</b>                                 | 2.069(1)                | <b>Average B''-O</b>                                                   | 2.05(1)                 |                                   |         |
| <b>Octahedron volume (Å<sup>3</sup>)</b>             | 11.7966                 | <b>Octahedron volume (Å<sup>3</sup>)</b>                               | 11.4448                 |                                   |         |
| <b>Distortion B''-O<sub>6</sub> x 10<sup>4</sup></b> | 0.31                    | <b>Distortion B''-O<sub>6</sub> x 10<sup>4</sup></b>                   | 17.0                    |                                   |         |
| <b>Quadratic elongation</b>                          | 1.0004                  | <b>Quadratic elongation</b>                                            | 1.0035                  |                                   |         |
| <b>Bond angle variance</b>                           | 1.2459 deg <sup>2</sup> | <b>Bond angle variance</b>                                             | 6.2738 deg <sup>2</sup> |                                   |         |
| <b>BVS</b>                                           | 2.18(1)                 | <b>BVS</b>                                                             | 2.33(7)                 |                                   |         |
| <b>NdO<sub>n</sub> polyhedron</b>                    |                         | <b>(Nd/Ca)O<sub>n</sub> polyhedron</b>                                 |                         | <b>NdO<sub>n</sub> polyhedron</b> |         |
| <b>Nd-O1 x 1</b>                                     | 2.606(3)                | <b>(Nd/Ca)-O1a x 1</b>                                                 | 2.73(2)                 | <b>Nd-O1a x 1</b>                 | 2.33(3) |
| <b>Nd-O1 x 1</b>                                     | 2.383(3)                | <b>(Nd/Ca)-O1a x 1</b>                                                 | 2.68(4)                 | <b>Nd-O1b x 1</b>                 | 2.51(3) |
| <b>Nd-O1 x 1</b>                                     | 2.740(4)                | <b>(Nd/Ca)-O1b x 1</b>                                                 | 2.40(3)                 | <b>Nd-O2a x 1</b>                 | 2.38(3) |
| <b>Nd-O2 x 1</b>                                     | 2.629(3)                | <b>(Nd/Ca)-O2a x 1</b>                                                 | 2.66(3)                 | <b>Nd-O2b x 1</b>                 | 2.59(3) |
| <b>Nd-O2 x 1</b>                                     | 2.368(4)                | <b>(Nd/Ca)-O2a x 1</b>                                                 | 2.73(4)                 | <b>Nd-O2b x 1</b>                 | 2.72(4) |
| <b>Nd-O2 x 1</b>                                     | 2.716(4)                | <b>(Nd/Ca)-O2b x 1</b>                                                 | 2.38(3)                 | <b>Nd-O3a x 1</b>                 | 2.36(3) |
| <b>Nd-O3 x 1</b>                                     | 2.456(2)                | <b>(Nd/Ca)-O3a x 1</b>                                                 | 2.54(1)                 | <b>Nd-O3b x 1</b>                 | 2.37(3) |
| <b>Nd-O3 x 1</b>                                     | 2.341(2)                | <b>(Nd/Ca)-O3b x 1</b>                                                 | 2.33(3)                 |                                   |         |
| <b>Average Nd-O</b>                                  | 2.530(1)                | <b>Average (Nd/Ca)-O</b>                                               | 2.55(1)                 | <b>Average Nd-O</b>               | 2.47(1) |
| <b>BVS</b>                                           | 2.75(1)                 | <b>BVS</b>                                                             | 2.57(8)                 | <b>BVS</b>                        | 2.77(9) |

<sup>a</sup> With [110], <sup>b</sup> With [1-10], <sup>c</sup>With [001]

[1] Zachariasen, W.H., Acta Crystallographica, 1963. **16**: p. 385.

[2] Robinson, K., Gibbs, G. V. & Ribbe, P. H., Science, 1971. **172**: p. 567-570.



**Table SI 5.** Curie constant  $C$  and Weiss temperature  $\theta$  values obtained by fitting the inverse of the molar magnetic susceptibility data to the function  $\chi^{-1} = \left(\frac{C}{T - \theta}\right)^{-1}$  in the temperature range 150–300 K; and the experimental magnetic moment  $\mu_{exp}$  values calculated as  $\sqrt{8 \times \frac{C}{2 - x}}$

| Compound<br>(Nd <sub>2-x</sub> Ca <sub>x</sub> MgTiO <sub>6-δ</sub> )   | $C$<br>(emu K mol <sup>-1</sup> Oe <sup>-1</sup> ) | $\theta$<br>(K) | $\mu_{exp}$<br>( $\mu_B$ per Nd) |
|-------------------------------------------------------------------------|----------------------------------------------------|-----------------|----------------------------------|
| Nd <sub>2</sub> MgTiO <sub>6</sub><br>(x=0.00)                          | 3.384±0.004                                        | -64.5±0.5       | 3.68±0.04                        |
| Nd <sub>1.90</sub> Ca <sub>0.10</sub> MgTiO <sub>5.95</sub><br>(x=0.10) | 3.331±0.002                                        | -57.7±0.2       | 3.65±0.03                        |
